# Supplementary material for: Metagenomic Insight into the Microbiome and Virome Associated with Aedes aegypti Mosquitoes in Manado (North Sulawesi, Indonesia)
Source: MDPI journal article supplement (doi:10.3390/idr15050054), 2023-09-11
Supplement: s1 [file s1]

**Supplementary Table S1:** Abundance of species corresponding to each respective barcode.

| Species  |                                   | Abundance of Each Species Within the Respective Barcode. |           |           |           |           |           |
|----------|-----------------------------------|----------------------------------------------------------|-----------|-----------|-----------|-----------|-----------|
|          |                                   | Barcode03                                                | Barcode04 | Barcode05 | Barcode06 | Barcode07 | Barcode08 |
| Fungi    | <i>Brettanomyces</i> sp.          | 44                                                       |           |           |           |           |           |
|          | <i>Brettanomyces acidodurans</i>  |                                                          |           |           | 139       |           |           |
|          | <i>Brettanomyces bruxellensis</i> |                                                          |           |           | 42        |           |           |
|          | <i>Brettanomyces custersianus</i> |                                                          |           |           | 31        |           |           |
| Bacteria | <i>Acetobacter oryzoeni</i>       |                                                          | 537       |           | 41        |           |           |
|          | <i>Acinetobacter indicus</i>      |                                                          |           |           | 140       |           |           |
|          | <i>Aeromonas hydrophila</i>       |                                                          |           | 99        |           |           |           |
|          | <i>Aeromonas veronii</i>          |                                                          |           | 48        |           |           |           |
|          | <i>Anaplasma phagocytophilum</i>  | 318                                                      |           |           |           |           |           |
|          | <i>Asaia bogorensis</i>           |                                                          | 8,809     |           |           |           |           |
|          | <i>Asaia krungthepensis</i>       |                                                          | 591       |           | 347       |           |           |
|          | <i>Asaia lannensis</i>            |                                                          |           |           | 49        |           |           |
|          | <i>Asaia prunellae</i>            |                                                          |           |           | 25        |           |           |
|          | <i>Chronobacter muytjensii</i>    |                                                          |           | 34        |           |           |           |
|          | <i>Citrobacter koseri</i>         |                                                          | 717       | 273       |           | 671       |           |
|          | <i>Cutibacterium acne</i>         | 129                                                      |           |           |           |           |           |
|          | <i>Dermacoccus barathri</i>       |                                                          |           | 29        |           |           |           |
|          | <i>Ehrlichia muris</i>            | 58                                                       |           |           |           |           |           |
|          | <i>Ehrlichia minasensi</i>        | 266                                                      |           |           |           |           |           |
|          | <i>Ehrlichia chaffensis</i>       | 39                                                       |           |           |           |           |           |
|          | <i>Enterobacter chuandaensis</i>  |                                                          |           | 321       |           |           |           |
|          | <i>Enterococcus sulfureus</i>     |                                                          | 371       |           |           |           |           |
|          | <i>Erwinia piriflorinigra</i>     |                                                          | 926       | 91        |           | 4,609     | 174       |
|          | <i>Franconibacter</i> sp.         |                                                          |           |           |           |           | 147       |
|          | <i>Franconibacter helveticus</i>  |                                                          |           | 60        |           | 185       |           |
|          | <i>Franconibacter daqui</i>       |                                                          |           | 48        |           | 179       |           |
|          | <i>Geminococcus roseus</i>        |                                                          |           |           | 46        |           |           |
|          | <i>Haemophilus parainfluenzae</i> |                                                          |           |           | 214       |           |           |
|          | <i>Herbaspirillum frisingense</i> | 60                                                       |           |           |           |           |           |

|                                         |     |       |       |     |     |     |
|-----------------------------------------|-----|-------|-------|-----|-----|-----|
| <i>Klebsiella pneumoniae</i>            |     | 548   |       |     | 136 |     |
| <i>Kluyvera ascorbata</i>               |     | 849   | 154   |     | 475 | 228 |
| <i>Komagataeibacter europaeus</i>       |     |       |       |     |     | 144 |
| <i>Lactococcus lactis</i>               |     | 2,422 |       |     |     |     |
| <i>Moraxella osloensis</i>              |     |       |       | 423 |     |     |
| <i>Pantoea stewartii</i>                |     |       | 1,170 |     |     |     |
| <i>Pectobacterium peruviansense</i>     |     |       |       |     | 176 |     |
| <i>Pheyllobacterium haematohilum</i>    | 34  |       |       |     |     |     |
| <i>Proteus columbae</i>                 |     | 851   |       |     |     |     |
| <i>Proteus faecis</i>                   |     | 1,390 |       |     |     |     |
| <i>Proteus hauseri</i>                  |     | 634   |       |     |     |     |
| <i>Proteus vulgaris</i>                 |     | 621   |       |     |     |     |
| <i>Providencia stuartii</i>             |     | 983   |       |     |     |     |
| <i>Pseudoxanthomonas kaohsiungensis</i> |     |       |       | 107 |     |     |
| <i>Pseudoxanthomona yeongjuensis</i>    |     |       |       | 42  |     |     |
| <i>Rahnella inusitata</i>               |     | 749   |       | 42  | 205 | 174 |
| <i>Rickettsia honei</i>                 | 32  |       |       |     |     |     |
| <i>Staphylococcus sp.</i>               |     |       |       |     |     | 149 |
| <i>Staphylococcus massiliensis</i>      | 38  |       |       |     |     |     |
| <i>Staphylococcus capitis</i>           | 71  |       |       |     |     |     |
| <i>Staphylococcus hominis</i>           |     |       |       | 121 |     |     |
| <i>Spiroplasma ixodetis</i>             | 944 |       |       |     |     |     |
| <i>Tatumella terea</i>                  |     |       | 55    |     | 182 |     |
| <i>Yersenia canariae</i>                |     |       |       |     | 305 | 142 |
| <i>Zhongshania aliphaticivorans</i>     | 63  |       |       |     |     |     |
| <i>Zymobacter palmae</i>                |     |       |       |     |     | 388 |
