# Supplementary material for: Metagenomic Insight into the Microbiome and Virome Associated with Aedes aegypti Mosquitoes in Manado (North Sulawesi, Indonesia)
Source: Infect Dis Rep. 2023 Sep 11;15(5):549–63. doi: 10.3390/idr15050054 (PMC10514871; doi:10.3390/idr15050054)

**Supplementary Figure S2:** Krona visualizations illustrating the composition and distribution of taxa in the microbiome of each representative Barcode.

Barcode03

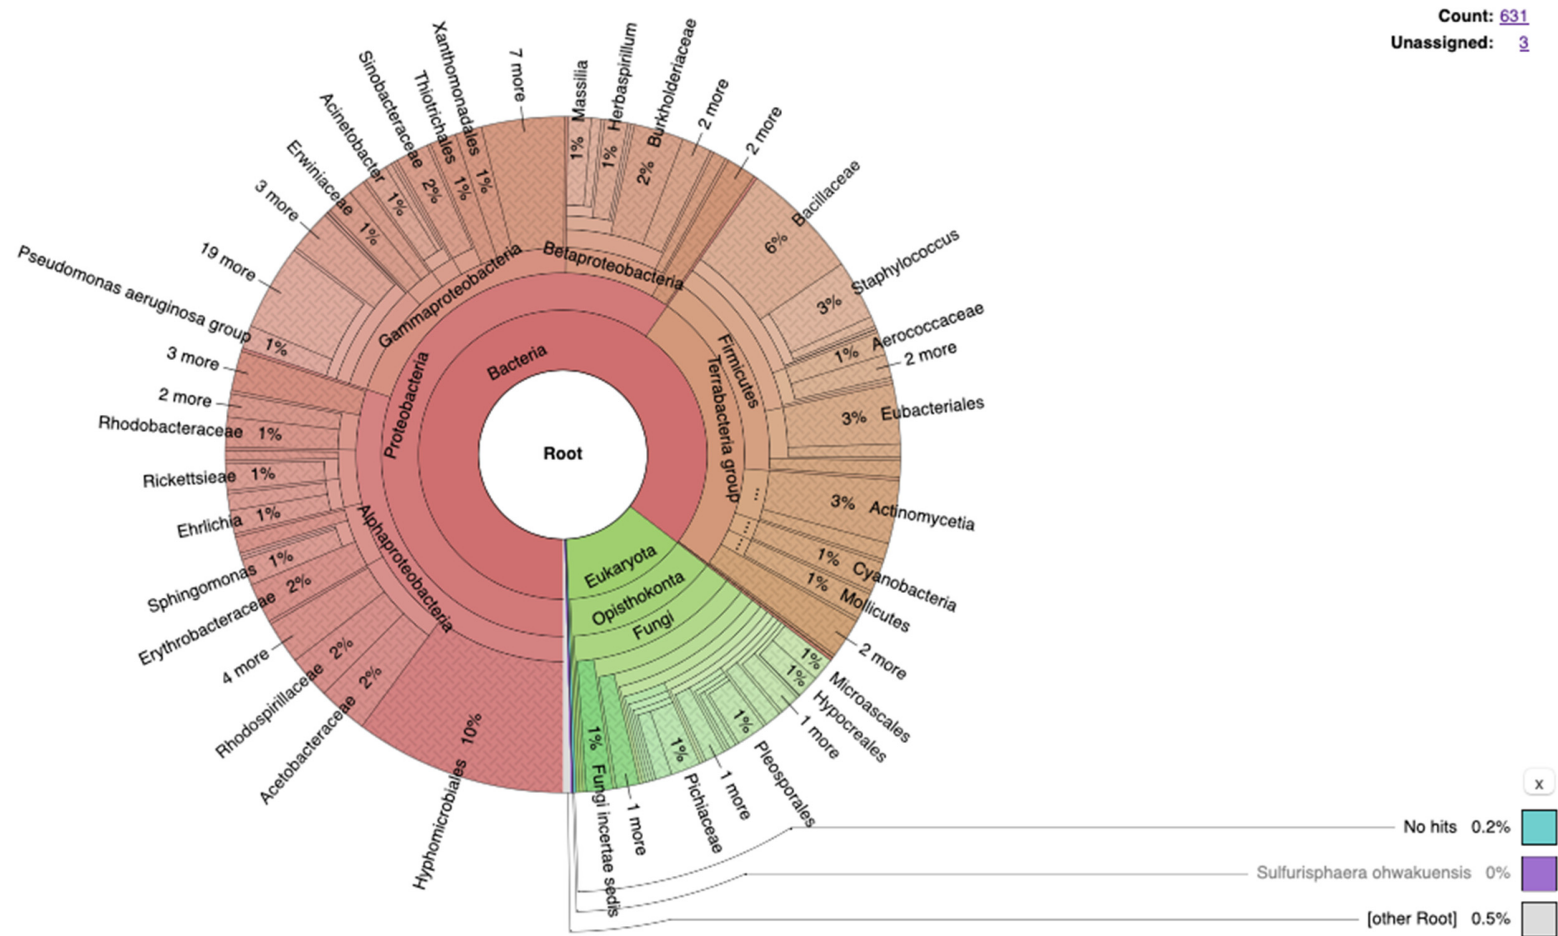

Barcode04

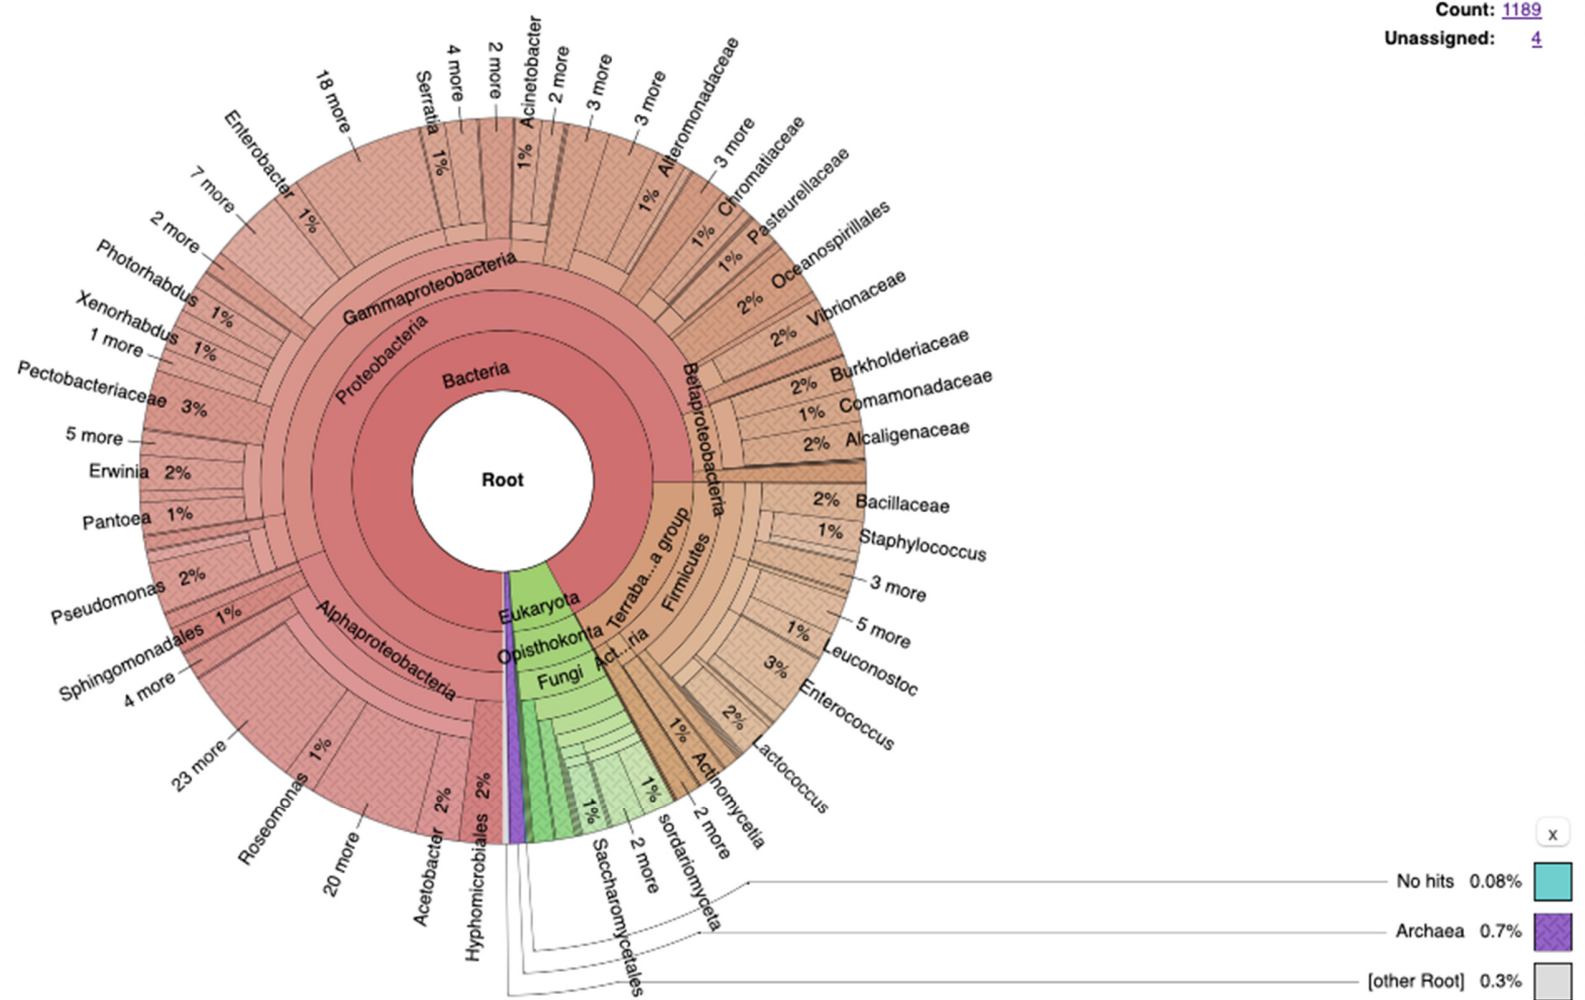

Barcode05

Count: 502  
Unassigned: 2

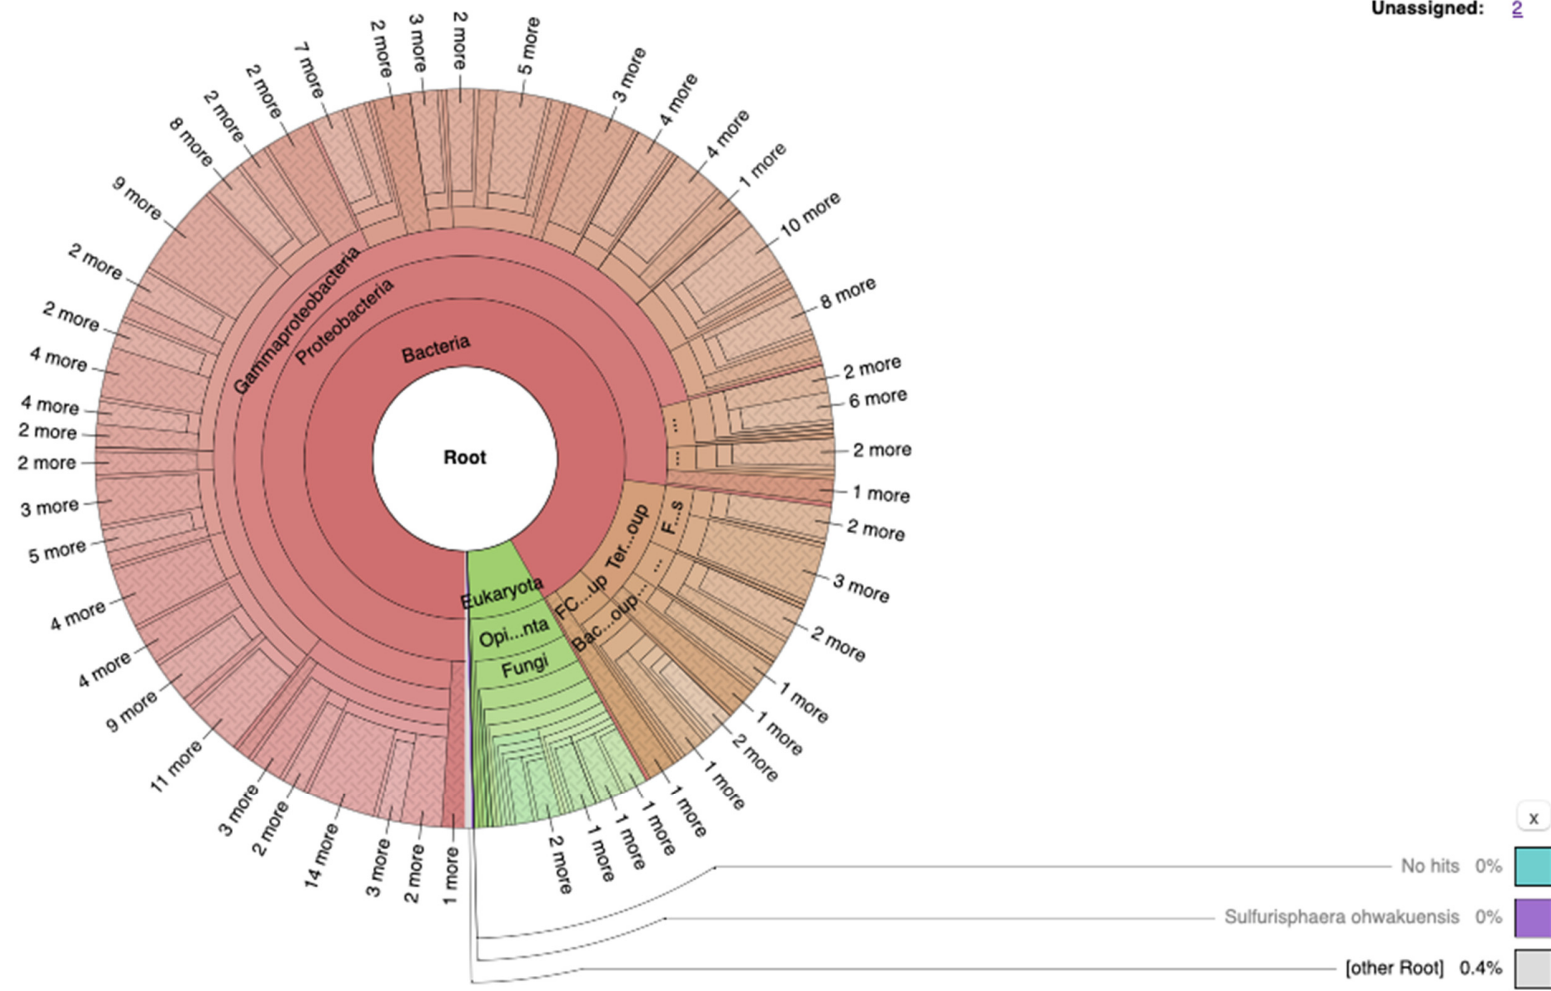

Barcode06

Count: 578  
Unassigned: 2

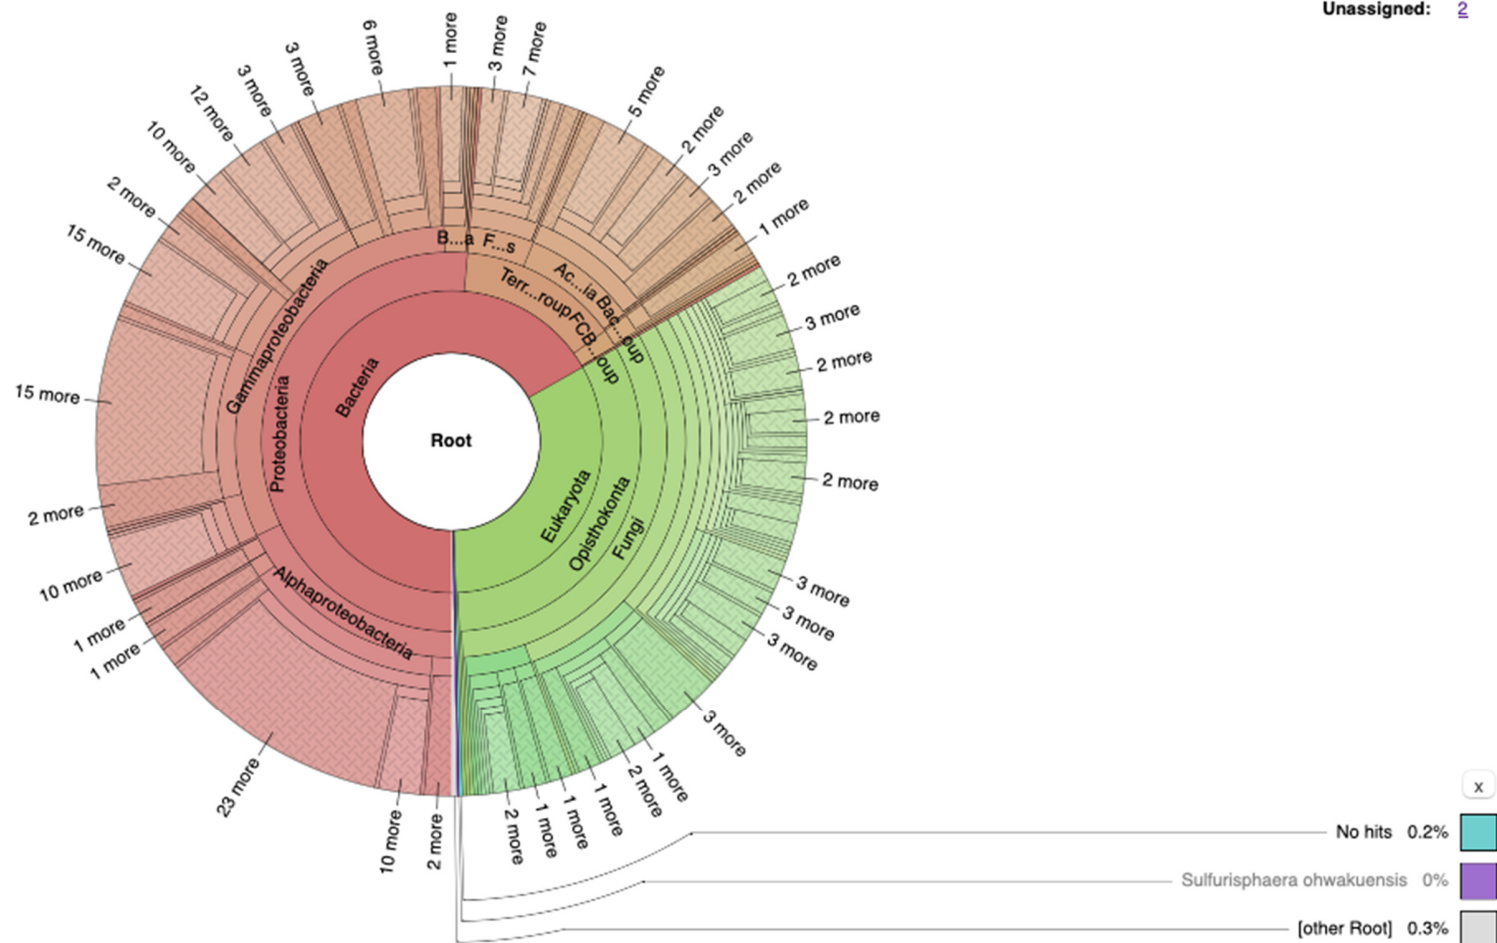

Barcode07

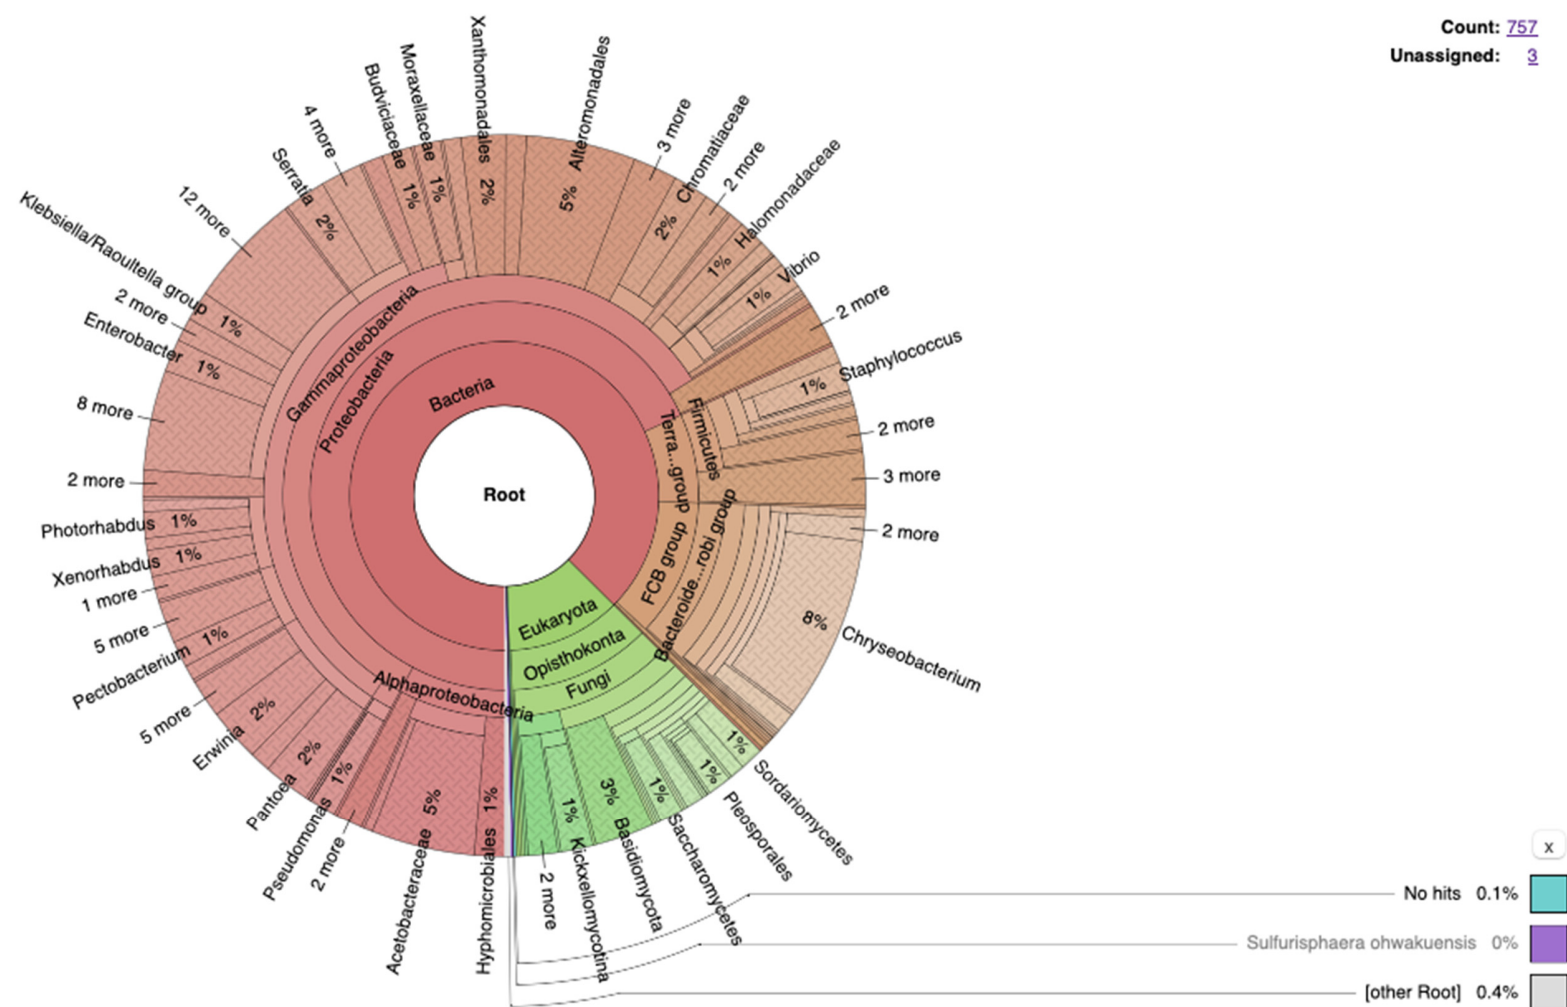

Barcode08

Count: 1014  
Unassigned: 3

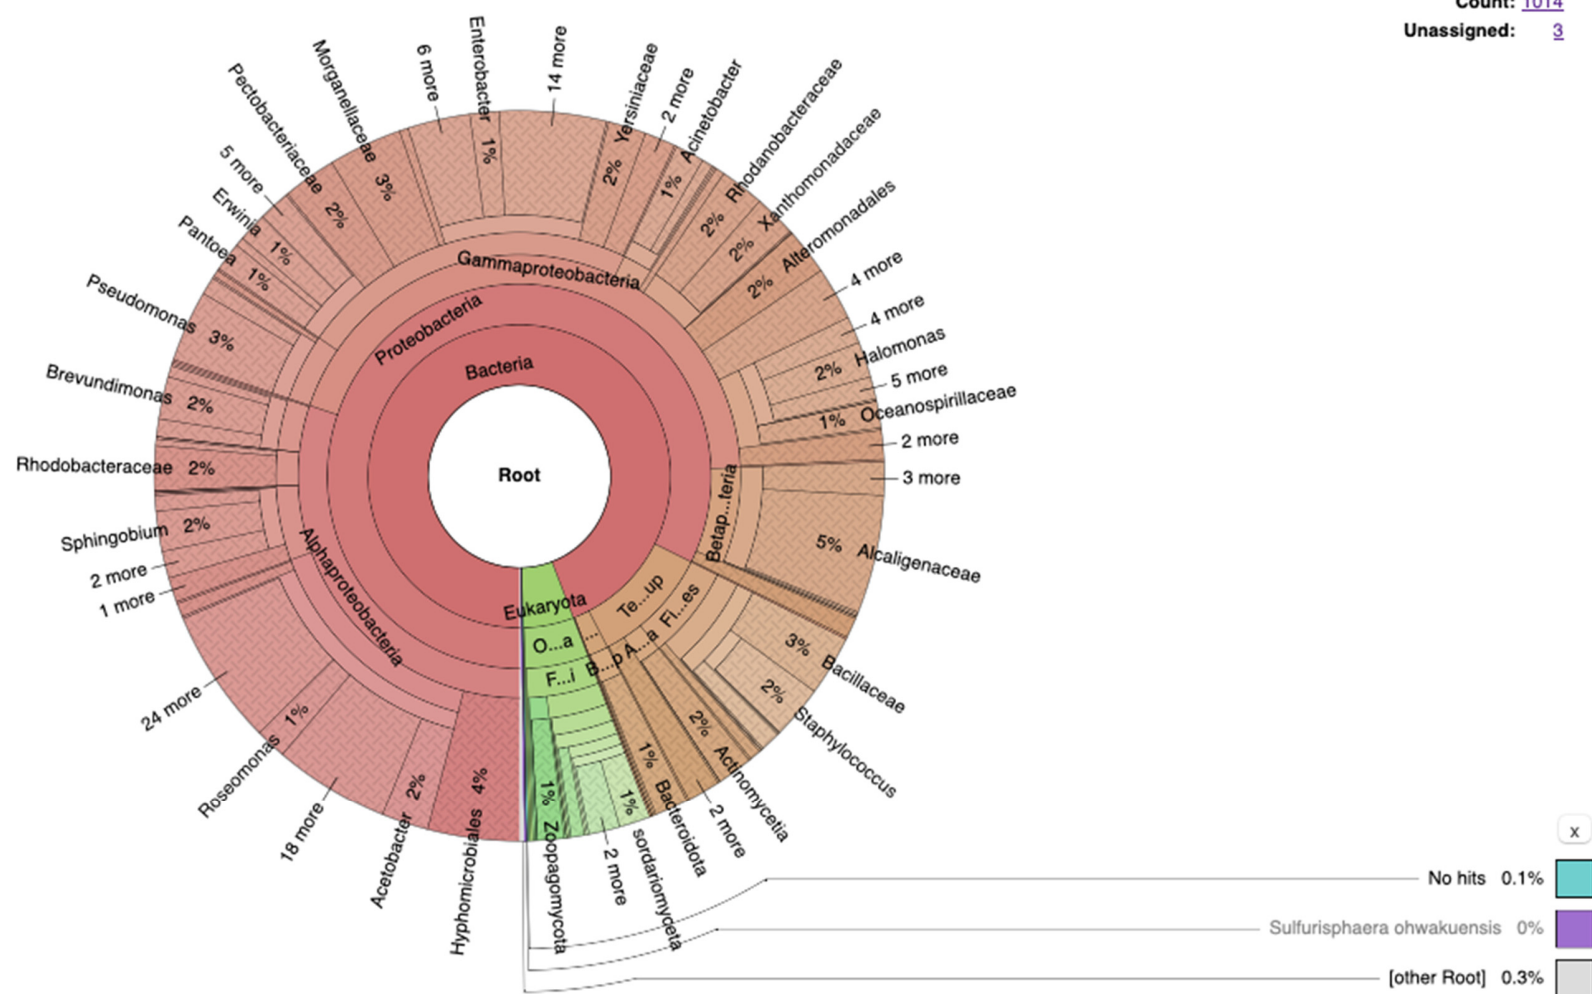

Supplement: Supplementary file 1 [file idr-15-00054-s001.zip › Supplementary Figure S2.pdf]
