# Supplementary figures and images for: Metagenomic Insight into the Microbiome and Virome Associated with Aedes aegypti Mosquitoes in Manado (North Sulawesi, Indonesia)
Source: MDPI journal article supplement (doi:10.3390/idr15050054), 2023-09-11

Barcode03

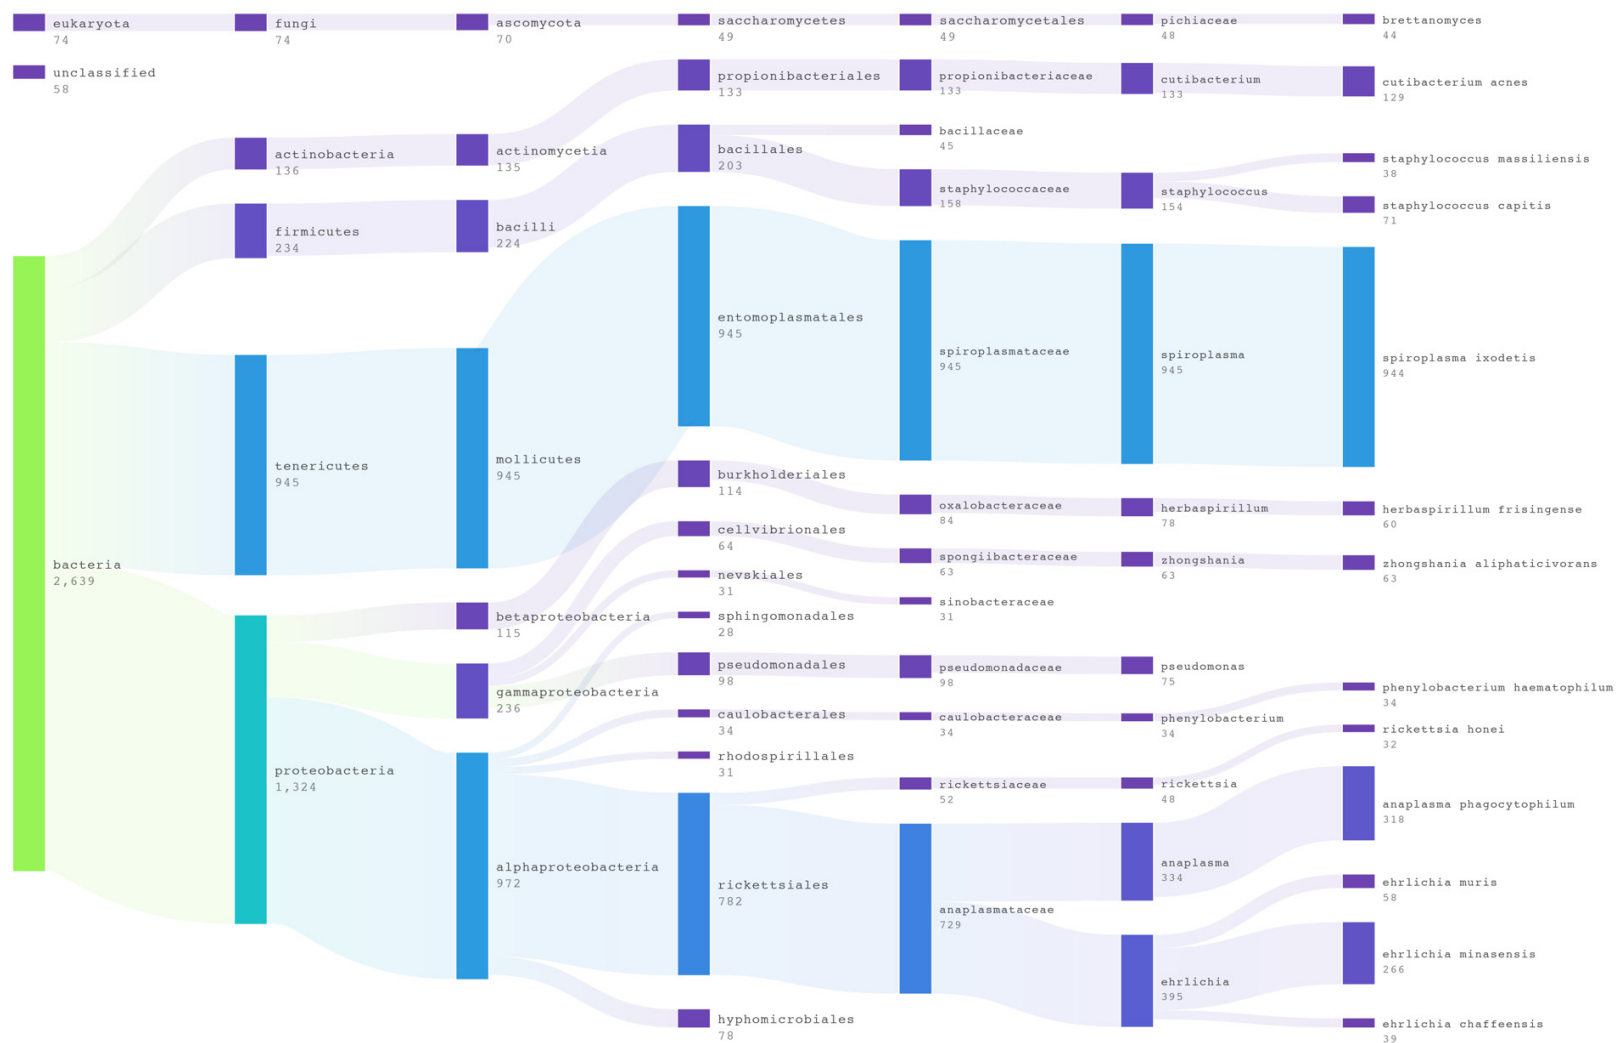

Barcode04

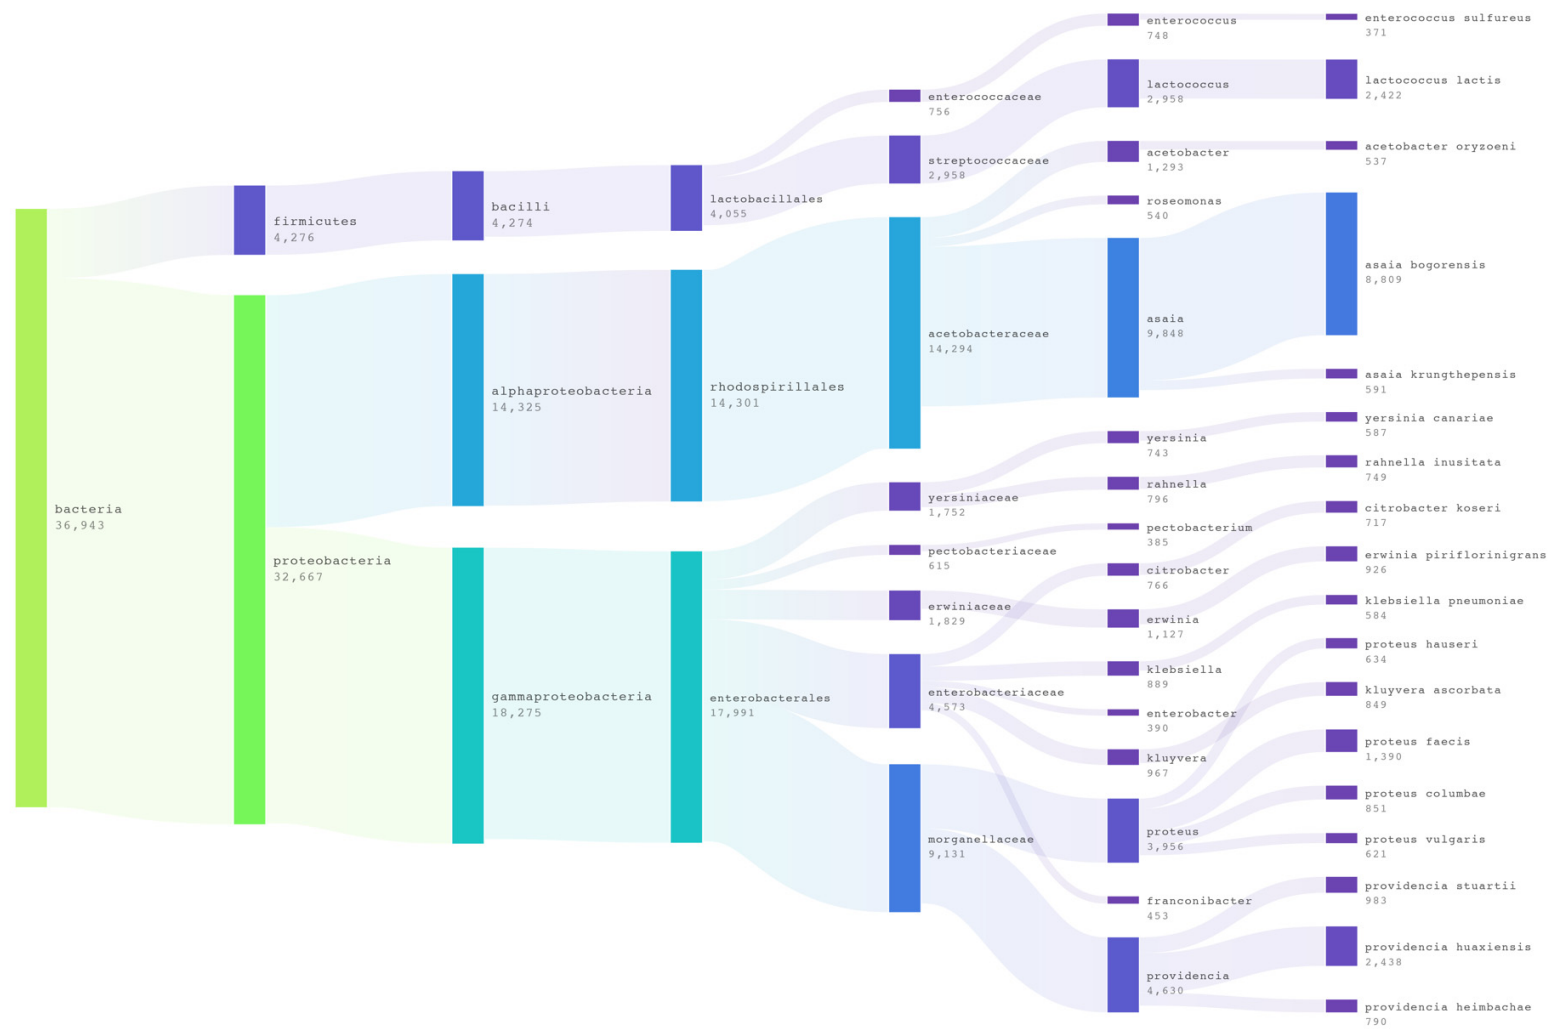

Barcode05

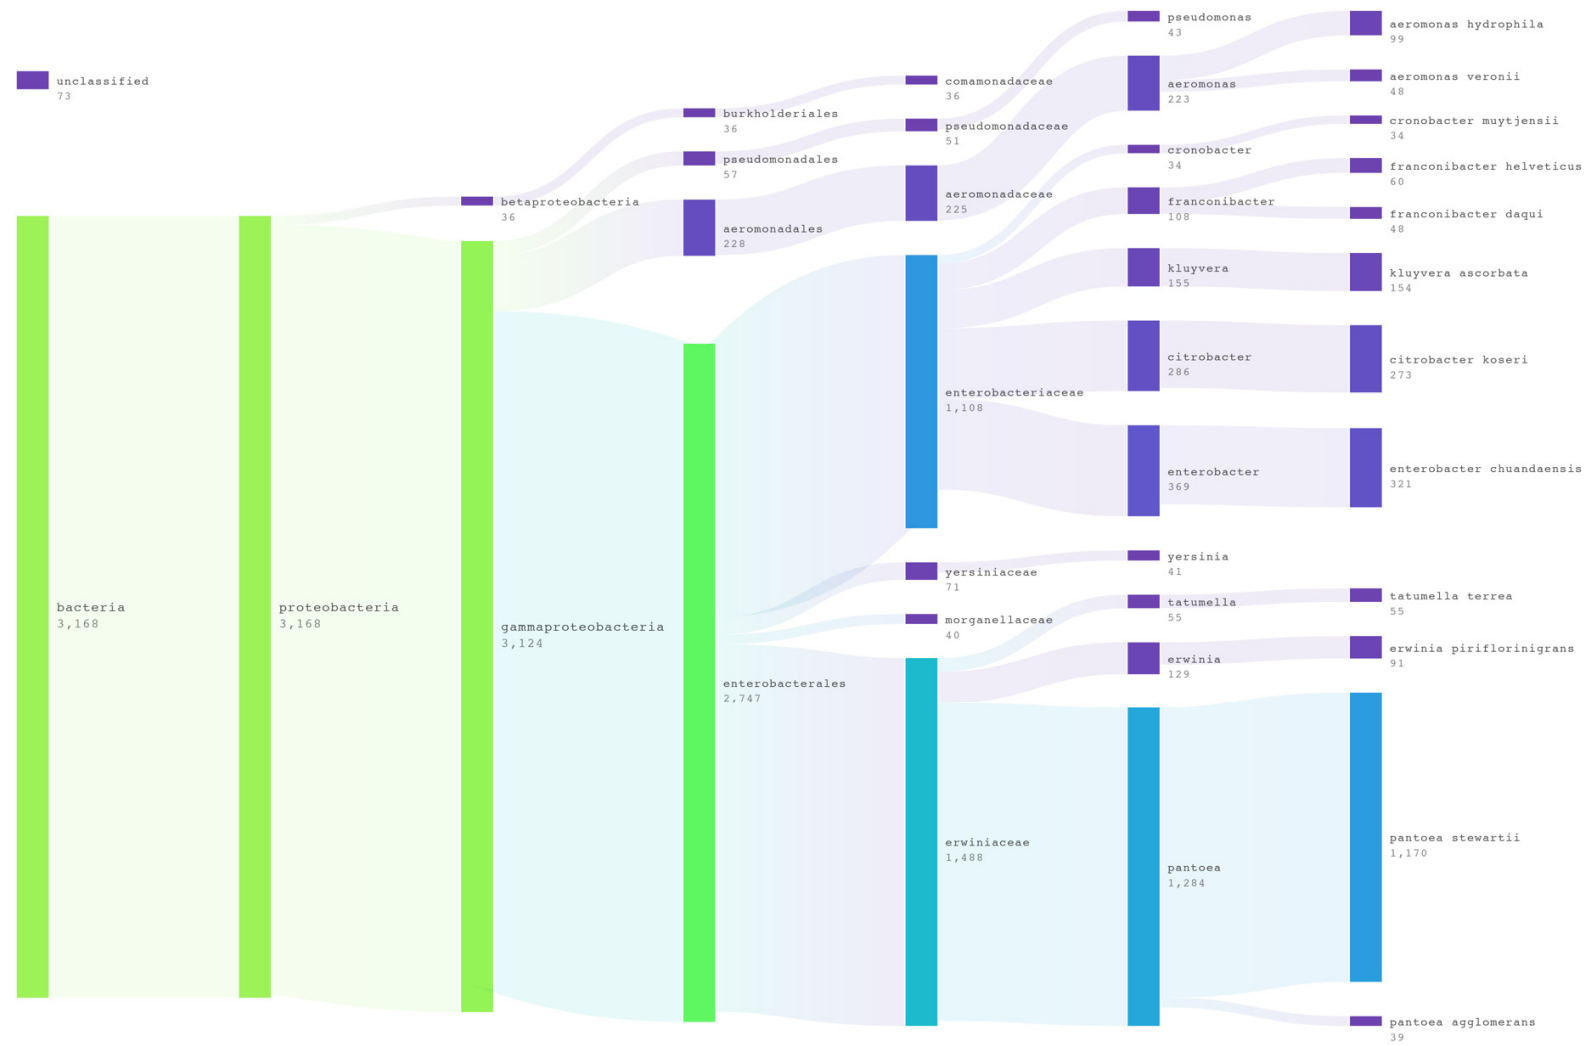

## Barcode06

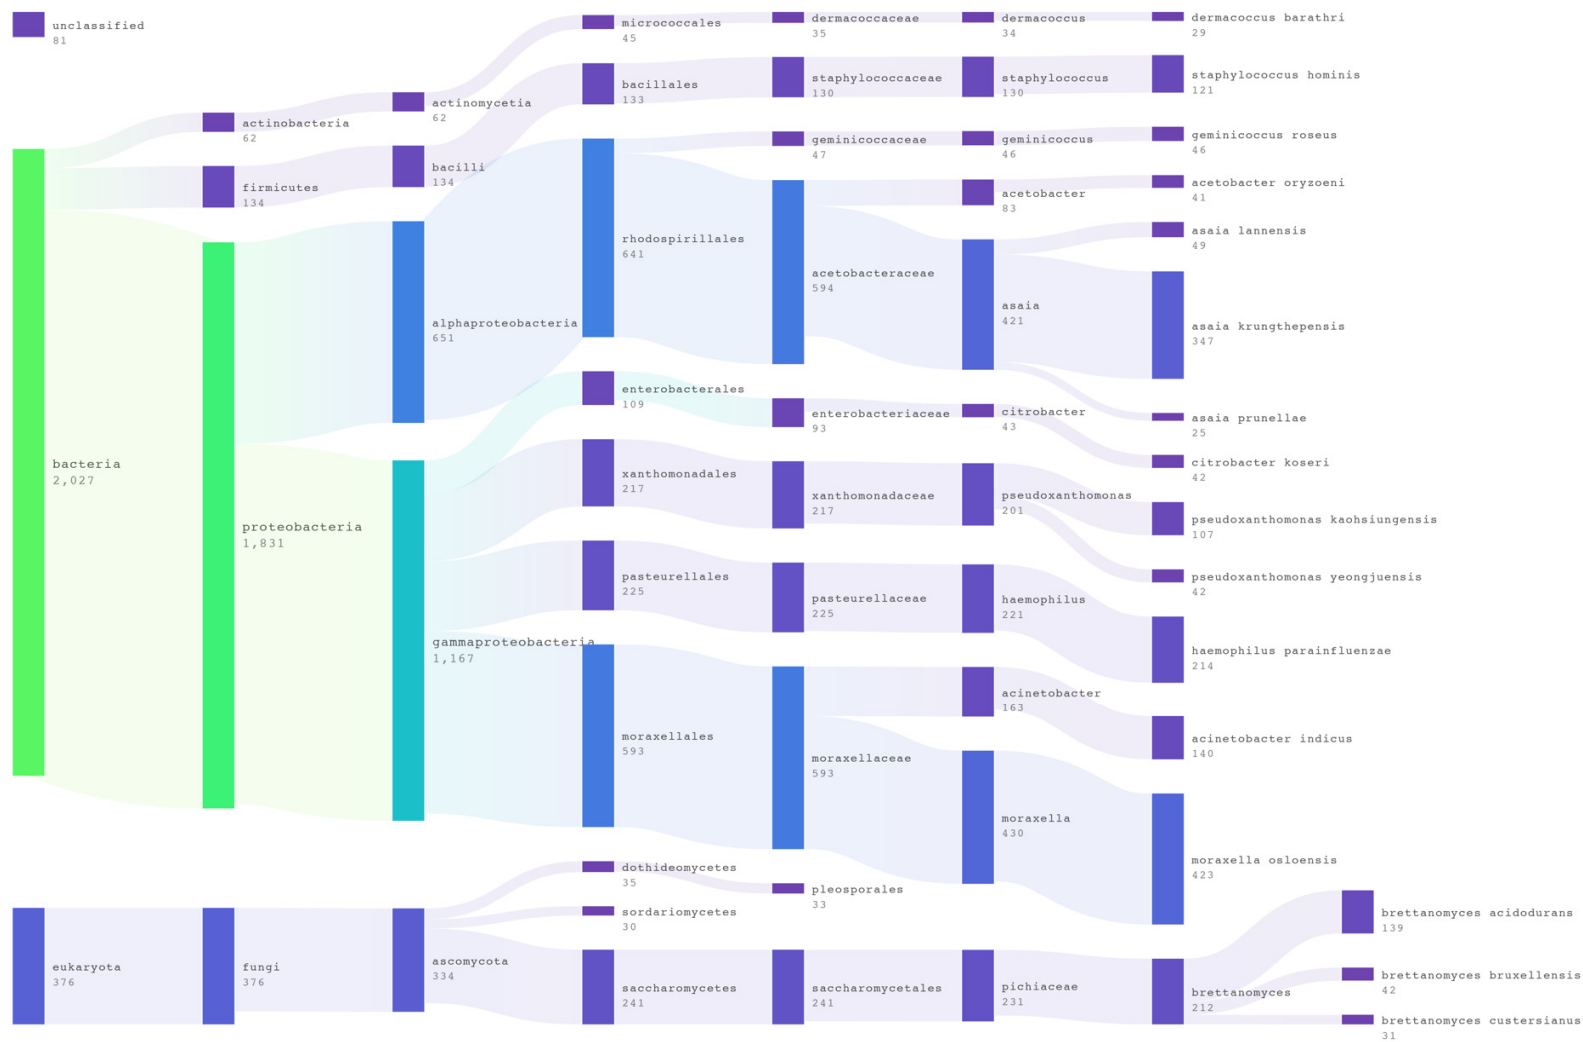

## Barcode07

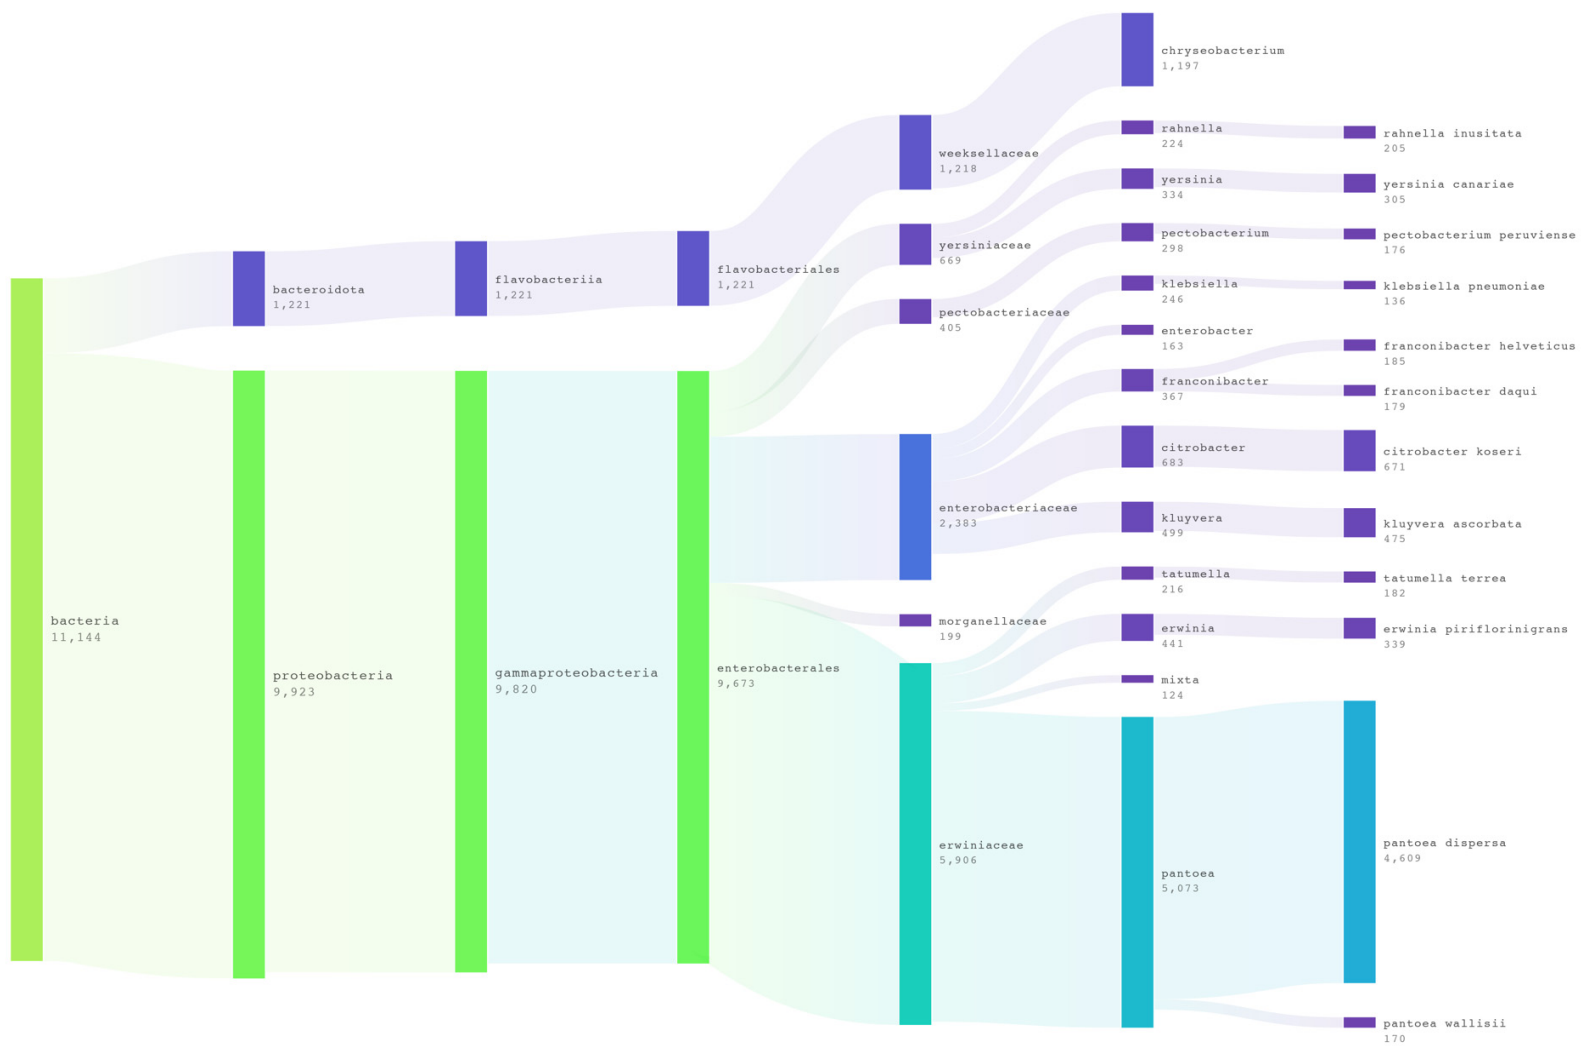

Barcode08

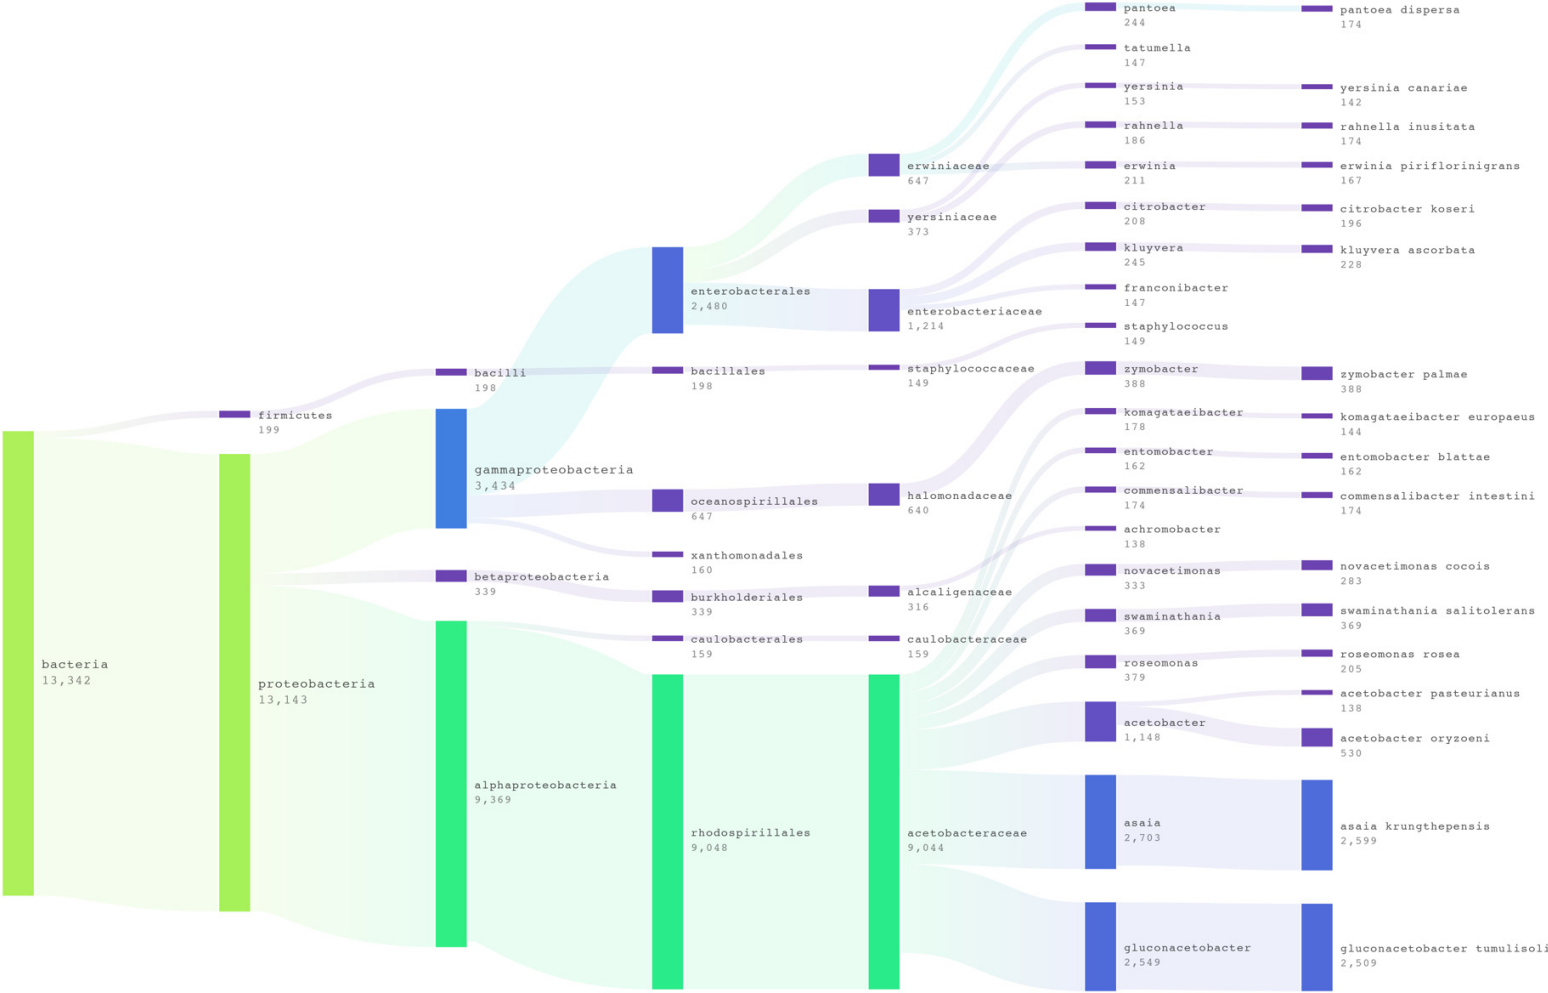

Supplement: s1 [file s1]

Barcode04

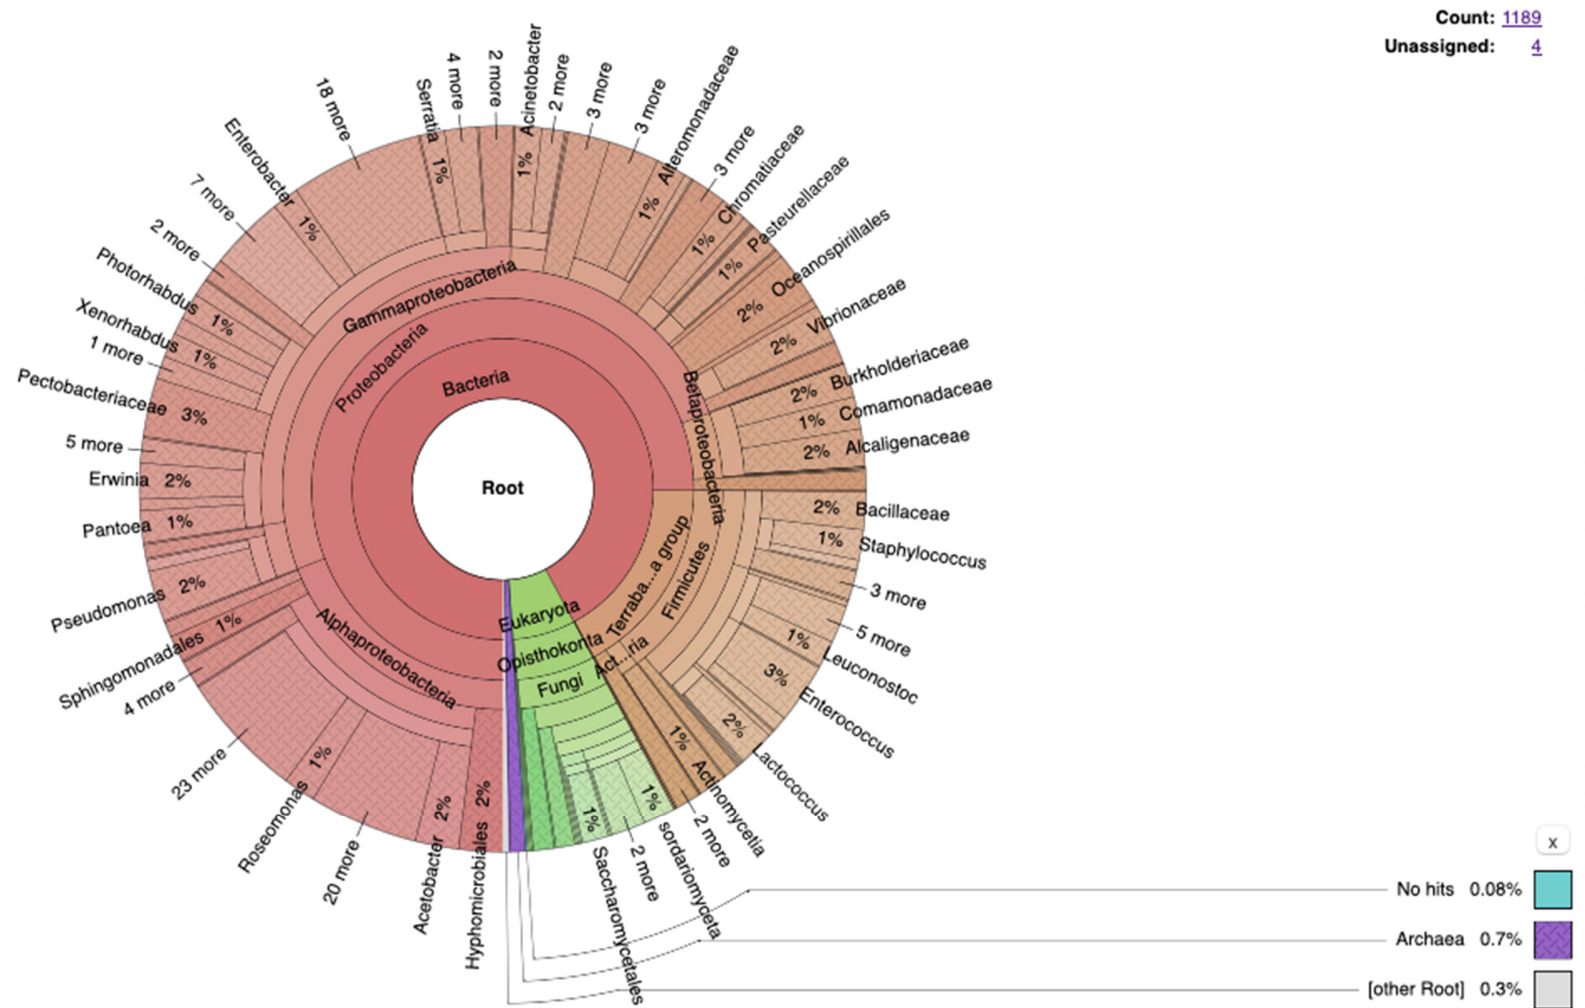

Barcode05

Count: 502  
Unassigned: 2

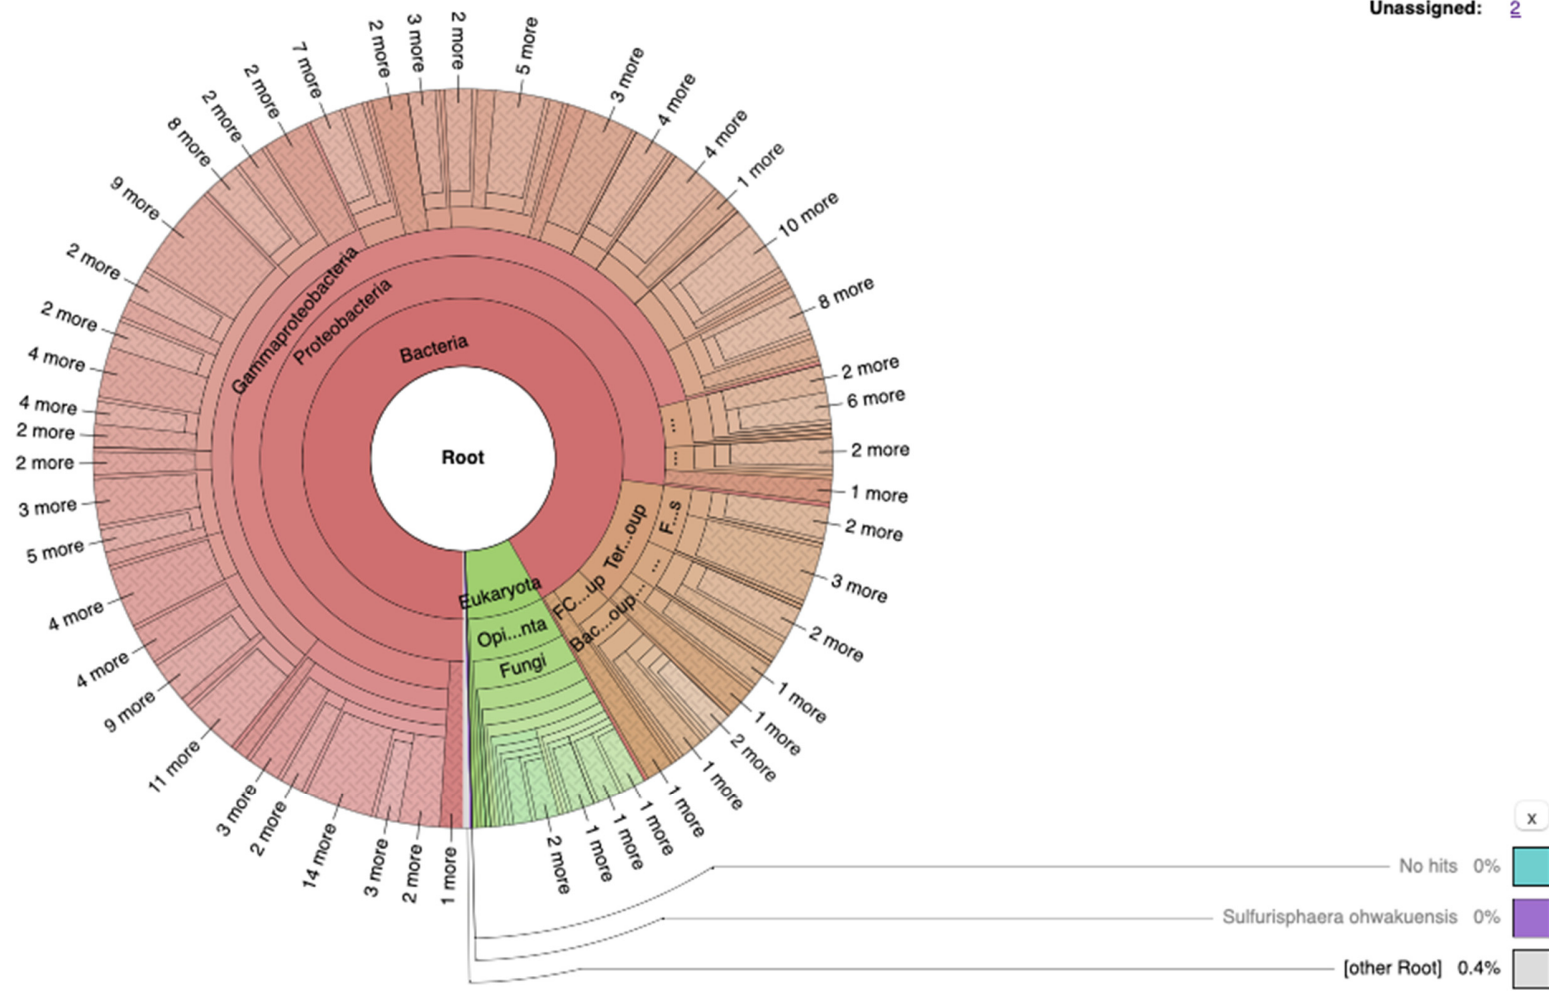

Barcode06

Count: 578  
Unassigned: 2

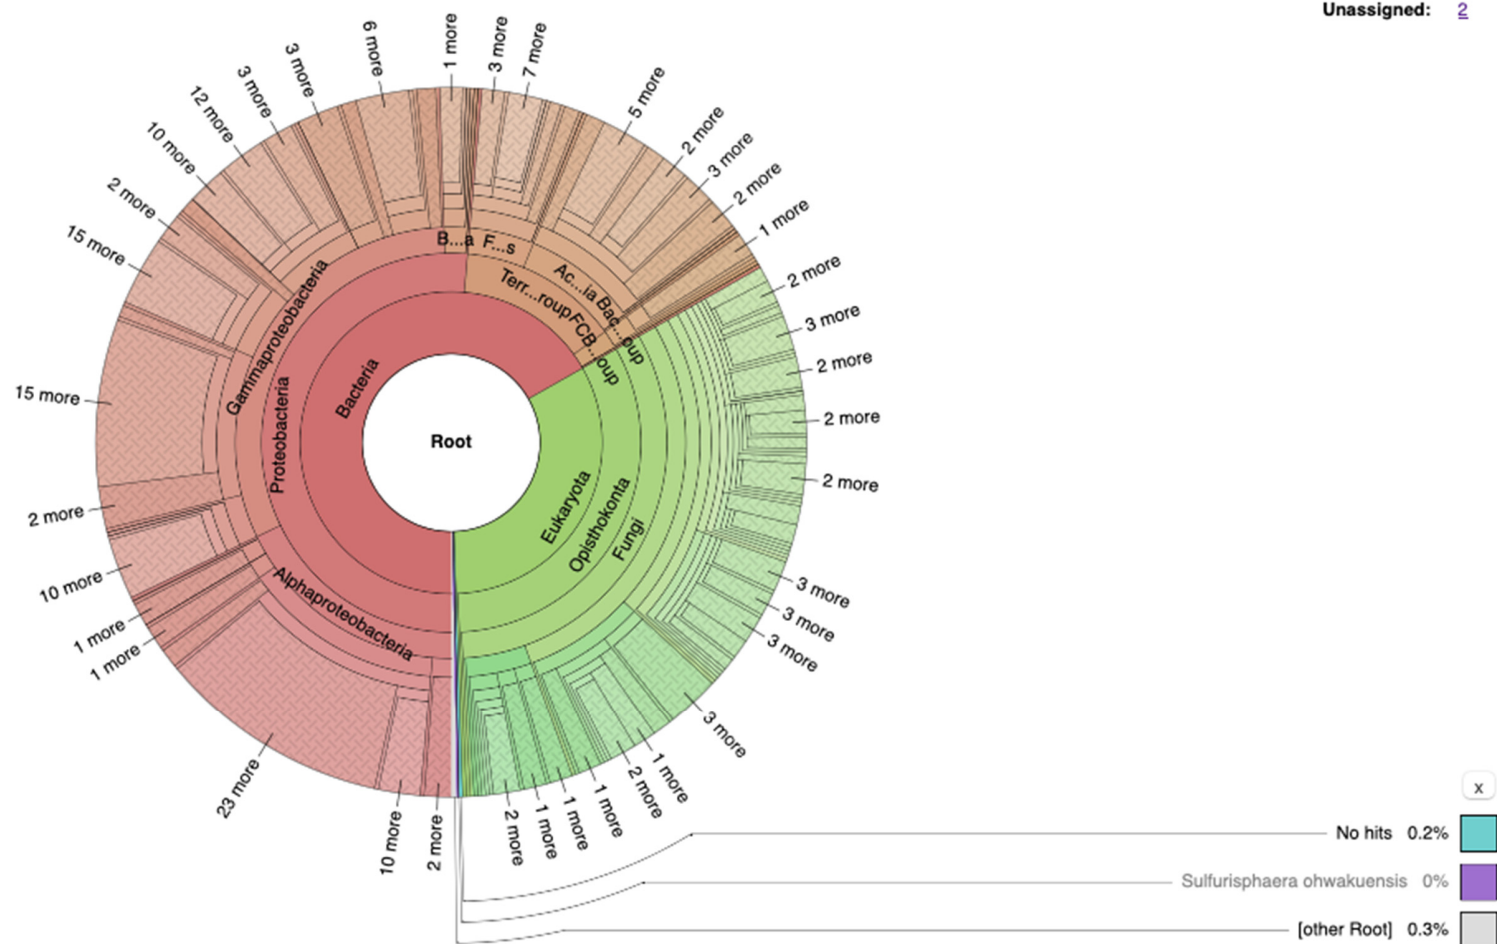

Barcode07

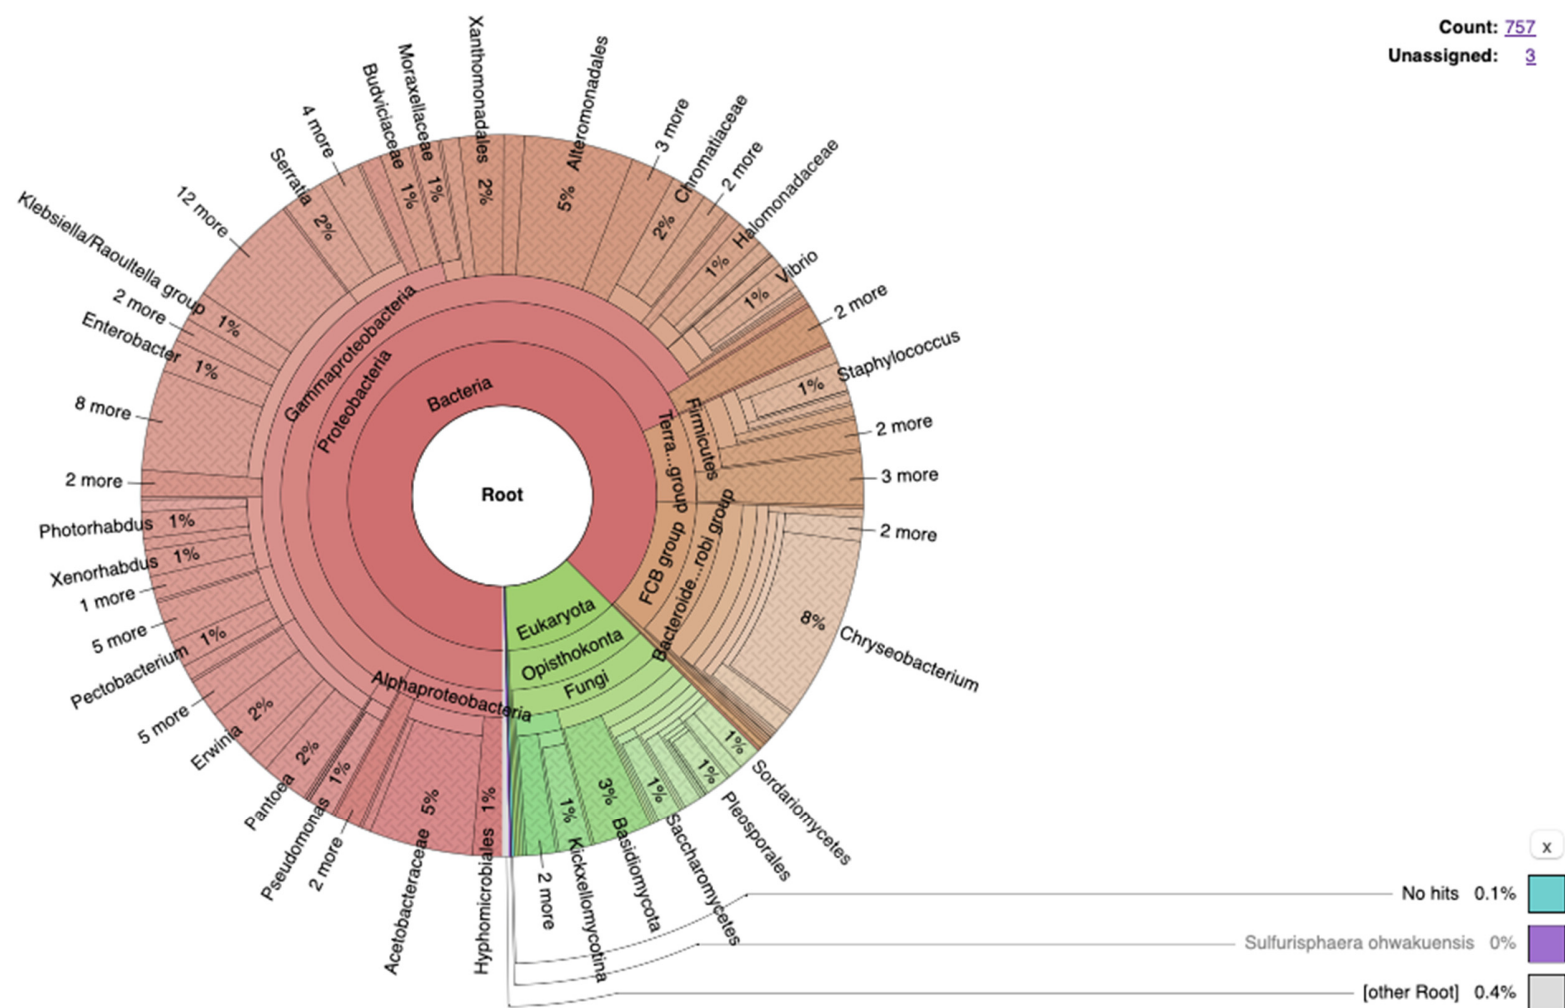



Barcode08

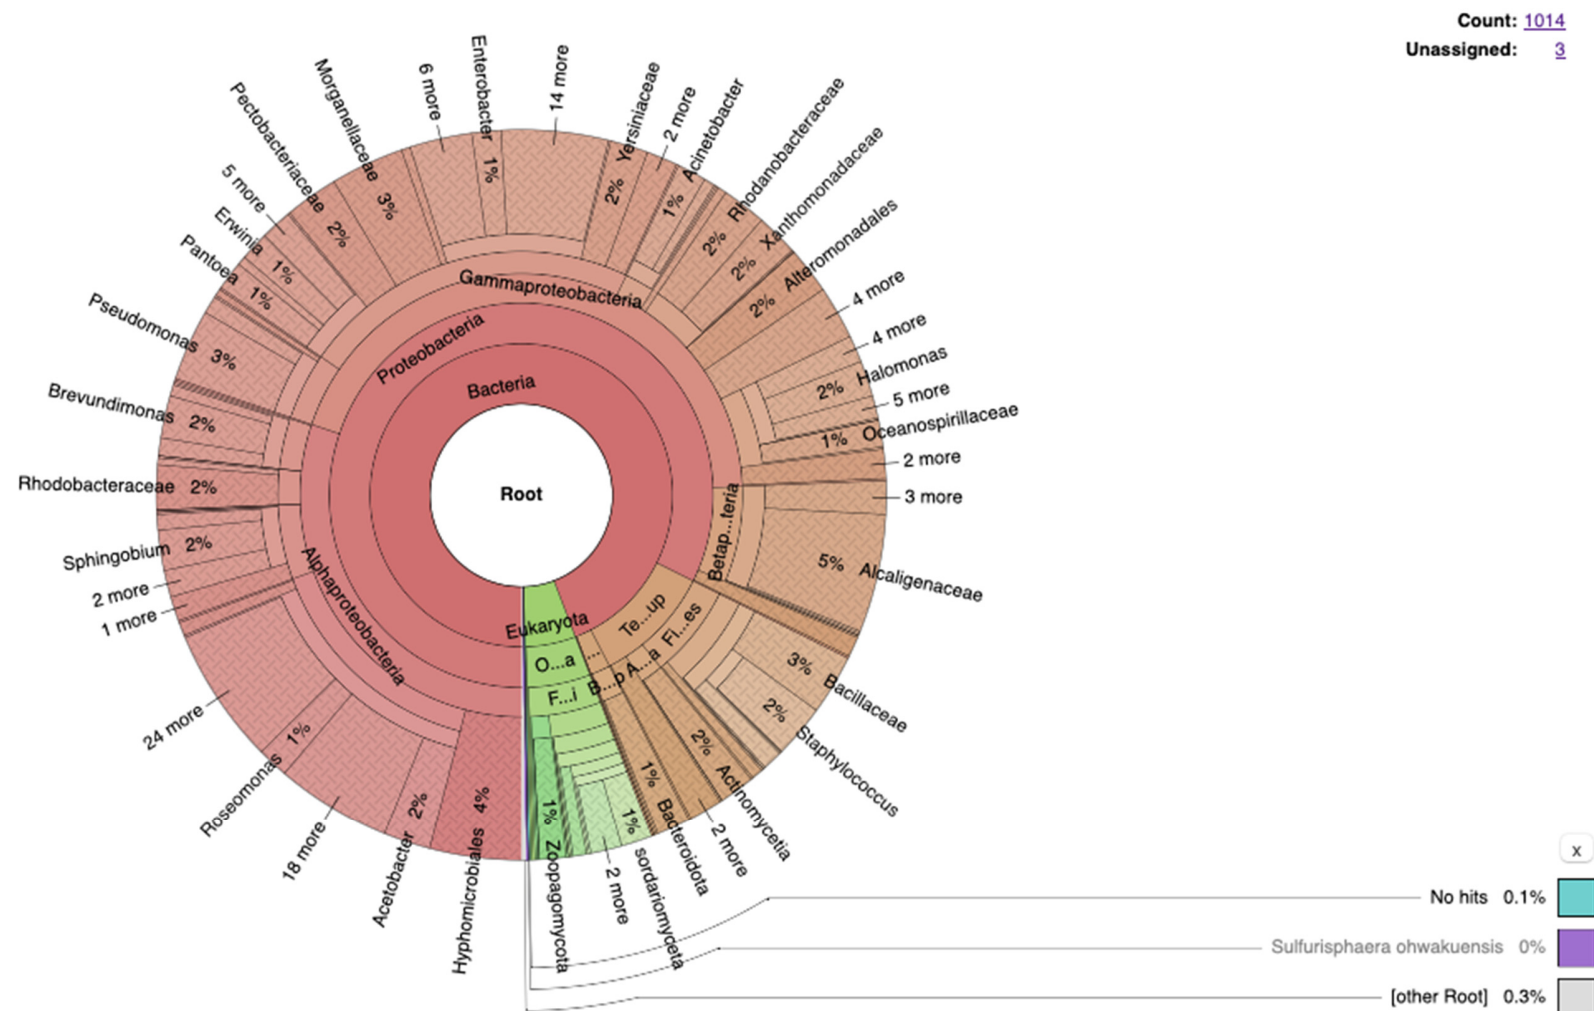

Supplement: s1 [file s1]
